# Supplementary material for: Self-assembled micelles of amphiphilic PEGylated rapamycin for loading paclitaxel and resisting multidrug resistant cancer cells
Source: PubMed Central journal article supplement (PMC4324122; doi:10.1039/c4tb01633e), 2015-01-27
Supplement: TB-003-C4TB01633E-s001.pdf [file TB-003-C4TB01633E-s001.pdf]

## Electronic Supporting Information (ESI)

---

### Self-assembled micelles of amphiphilic PEGylated rapamycin for loading paclitaxel and resisting multidrug resistant cancer cells

Wei Tian<sup>a&</sup>, Jieying Liu<sup>a&</sup>, Yuan Guo<sup>b</sup>, Yuanyuan Shen<sup>a</sup>, Dejian Zhou<sup>\*b</sup> and Shengrong Guo<sup>\*a,b</sup>

<sup>a</sup>*School of Pharmacy, Shanghai Jiao Tong University, 800 Dongchuan Road, Shanghai 200240, China.*

<sup>b</sup>*School of Chemistry and Astbury Centre for Structural Molecular Biology, University of Leeds, Leeds LS2 9JT, UK.*

&: equal contributors

\*: corresponding to Dr. Zhou ([d.zhou@leeds.ac.uk](mailto:d.zhou@leeds.ac.uk)) or Dr. S. Guo ([s.guo@leeds.ac.uk](mailto:s.guo@leeds.ac.uk) or [srguo@sjtu.edu.cn](mailto:srguo@sjtu.edu.cn))

#### Experimental Section

##### 1. Materials

Monomethoxypoly(ethylene glycol) (mPEG, Mn = 2000) was purchased from Fluka, USA. Rapamycin was purchased from Sigma-Aldrich (St. Louis, MO, USA). Paclitaxel was purchased from Yunnan Ziyun Biotechnology Co., Ltd. (China) and its chemical structure is shown in Scheme S1. Pyrene was purchased from Alfa Aesar (USA). Penicillin, streptomycin, fetal bovine serum (FBS), and 0.25% (w/v) trypsin- 0.03% (w/v) EDTA solution were purchased from Solarbio Science & Technology Co., Ltd. (Beijing, China). RPMI-1640 medium was purchased from Gibco BRL (Gaithersburg, MD, USA). Propidium iodide (PI) was purchased from US Biological (MA, USA). All other chemicals were of analytical or HPLC grade commercially available.

##### 2. Preparation of mPEG-SA-rapamycin conjugate

###### 2.1 Preparation of mPEG-SA conjugate

mPEG-SA conjugate was prepared as described previously.<sup>1</sup> Briefly, 2.0 g of mPEG (Mn=2000, 1.0 mmol) reacted with 110 mg of succinic anhydride (1.0 mmol) in the presence of 30 mg of p-toluene

sulfonic acid (0.17 mmol). The reaction was performed under nitrogen atmosphere at 80°C for 3 h. The resulting product was dissolved in 5 mL CH<sub>2</sub>Cl<sub>2</sub>, filtered, then precipitated by adding 50 mL anhydrous diethyl ether, and finally dried under vacuum to obtain 1.56 gmPEG-SA (yield, 74.3%). <sup>1</sup>H NMR (400 MHz, CDCl<sub>3</sub>, δ ppm): 3.5-3.8 (m, ~176H, PEG chain -O-CH<sub>2</sub>CH<sub>2</sub>O-), 3.37 (3H, s, CH<sub>3</sub>O-), 2.65 (4H, m, -O<sub>2</sub>C-CH<sub>2</sub>-CH<sub>2</sub>-CO<sub>2</sub>H).

## 2.2 Preparation of mPEG-SA-rapamycin conjugate

mPEG-SA-rapamycin was prepared according to the previous report<sup>2</sup> with a minor modification. Briefly, mPEG-SA (88 mg, 0.042 mmol) was dissolved in 10 mL of anhydrous CH<sub>2</sub>Cl<sub>2</sub>, and then cooled down to 0°C. 107 mg rapamycin (0.12 mmol), 30 mg DCC (0.15 mmol) and 15 mg DMAP were added into it. The resulting solution was stirred at 0°C for 1 h, then allowing to warm up to room temperature and keep stirring for 72 h. The reaction mixture was filtered and precipitated by anhydrous diethyl ether for two times. The precipitate was dried under vacuum to get 81.1 mg mPEG-SA-rapamycin (yield, 64.5%). <sup>1</sup>H NMR (400 MHz, CDCl<sub>3</sub>, δ ppm) spectra of rapamycin, mPEG-SA and mPEG-SA-rapamycin and the representative O-Me proton assignments according to ref. 10 are shown in **Figure S1A**. Thin layer chromatography (TLC, silica gel) analysis of the mPEG-SA-rapamycin conjugate yielded a single peak (silica gel, 10% MeOH in CH<sub>2</sub>Cl<sub>2</sub>) with a R<sub>f</sub> value of 0.25, which is completely different from that of the mPEG-SA (**1**, R<sub>f</sub> = 0.10), and rapamycin (**2**, R<sub>f</sub> = 0.60), confirming that the mPEG-SA-rapamycin conjugate is pure (**Figure S1B**).

## 3. Water solubility measurement

The water solubility of mPEG-SA-rapamycin was estimated by simple visual determination.<sup>3</sup> Briefly, a predetermined amount of mPEG-SA-rapamycin or rapamycin sample and 1 mL water were added into a microcentrifuge tube. The tube was placed in a shaking water bath at 25°C with a shaking speed of 100 rpm. After 24 h, the tubes were observed by the naked eyes.

## 4. Preparation of mPEG-SA-rapamycin micelles

mPEG-SA-rapamycin micelles were prepared by a solid dispersion method.<sup>4</sup> Briefly, mPEG-SA-rapamycin (1 mg) was dissolved in 200 μL acetonitrile to form a mPEG-SA-rapamycin acetonitrile solution. The solution was evaporated under reduced pressure at 25 °C to remove acetonitrile, and then vortexed for 5 min after adding 4 mL water. The aqueous solution was filtered

through 0.45 $\mu$ m filter (Agela Technologies Inc., China) to produce a transparent micelles solution, which was freeze-dried and stored at 4 °C for further use.

## **5. Characterization of mPEG-SA-rapamycinmicelles**

### *5.1 Critical micelle concentration (CMC) determination*

The CMC of mPEG-SA-rapamycinmicelles was determined by a steady-state pyrene fluorescence method using a Hitachi F-7000 spectrophotometer.<sup>5</sup> The emission wavelength was set at 395 nm and the excitation spectra were recorded from 300 to 350 nm with a bandwidth of 5 nm. The intensity ratio at 337 and 334 nm ( $I_{337}/I_{334}$ ) was used to determine the CMC.

### *5.2 Particle size and zeta potential ( $\zeta$ ) measurements*

The zeta potential, particle size and size distribution of mPEG-SA-rapamycin micelles were determined by dynamic light scattering (DLS) using a Zetasizer Nano ZS (Malvern Instrument) at 25 °C. Data are displayed as the mean value of at least three measurements  $\pm$  standard deviation.

## **6. Preparation and characterization of paclitaxel-loaded mPEG-SA-rapamycinmicelles**

### *6.1 Preparation of paclitaxel-loaded mPEG-SA-rapamycinmicelles*

Paclitaxel loaded mPEG-SA-rapamycinmicelles were prepared by a solid dispersion method.<sup>6</sup> Briefly, paclitaxel (0.9mg) and mPEG-SA-rapamycin (9mg) were dissolved in 100 $\mu$ L acetonitrile to form a paclitaxel and mPEG-SA-rapamycin solution. The solution was evaporated under reduced pressure at 25 °C to remove acetonitrile, and then vortexed for 5 min after adding 10 mL water. The aqueous solution was filtered through a 0.45 $\mu$ m filter (Agela Technologies Inc., China) to produce a transparent micellar solution, which was freeze-dried and stored at 4 °C for further use.

### *6.2 Physico-chemical characterization of paclitaxel-loaded mPEG-SA-rapamycinmicelles*

The measurements of particle size and size distribution, zeta potential of paclitaxel-loaded mPEG-SA-rapamycinmicelles were the same as those of mPEG-SA-rapamycinmicelles, described above.

***Quantification of encapsulation efficiency and drug loading.*** The paclitaxel-loaded mPEG-SA-rapamycinmicelles was treated with acetonitrile to get free paclitaxel solution, then

filtered with a 0.45 $\mu$ m syringe filter and quantitatively analyzed using high-performance liquid chromatography (HPLC) equipped with a LC-10AVP pump, a SPD-10AVP UV-vis detector (Shimadzu Co., Japan). Each sample solution (30 $\mu$ l) was injected at least three times into a Diamonsil C18 reversed phase column (150 $\times$ 4.60 mm, 5 $\mu$ m) preceded by a C18 guard column (Dikma, China). The mobile phase was a mixture of water and acetonitrile (50:50 v/v). The elution rate was 1.0 mL/min and the paclitaxel detection wavelength was set at 227 nm. The encapsulation efficiency and drug loading content were calculated as below [7]:

$$\text{Encapsulation efficiency(\%)} = \frac{\text{weight of paclitaxel in micelles}}{\text{weight of feeding paclitaxel}} \times 100\%$$
$$\text{Drug loading content(\%)} = \frac{\text{weight of paclitaxel in micelles}}{\text{weight of micelles}} \times 100\%$$

***In vitro* release test.** In order to create pseudo-sink condition, the *in vitro* drug release from micelles was determined in 0.01 M PBS(pH 5.0, 7.4) containing 1% w/v Tween-80 [8]. 1 mL of the paclitaxel-loaded micelles was filled into a dialysis tube (molecular weight cutoff = 1,000, Snakeskin, Pierce, USA). The dialysis tube was immersed fully in 5mL of the release medium and placed in a shaking water bath at 37 $^{\circ}$ C with a shaking speed of 100 rpm. At predetermined time intervals, the release medium was completely withdrawn and replaced with fresh release medium. The collected samples were diluted with acetonitrile for HPLC analysis. All measurements were determined in triplicates.

## 7. Cell culture

Cell culture experiments were performed in one medium (a RPMI-1640 medium with 10% fetal bovine serum (FBS) and 1% penicillin-streptomycin), at 37 $^{\circ}$ C under 5% CO<sub>2</sub> atmosphere in an incubator. MCF-7 cells were obtained from Shanghai Institute of Cell Biology, Chinese Academy of Sciences

## 8. Cell cycle analysis

MCF-7 cells were seeded at a density of 1.5 $\times$ 10<sup>5</sup> cells/mL (2 mL medium/well) in 6-well plates and incubated in media for 24 h and then treated with rapamycin and mPEG-SA-rapamycin at an equivalent rapamycin concentration of 20 ng/mL for 24 h at 37  $^{\circ}$ C. After removal of the media and washing with cold PBS three times, the cells were collected by centrifugation and then fixed with 70% pre-cooled alcohol overnight at 4  $^{\circ}$ C. Afterwards, the cells were washed to eliminate alcohol

and then treated with RNase A (0.1 mg/mL) and PI (0.1 mg/mL) in the dark for 30 min at 37 °C, the cell cycle distribution was analyzed by flow cytometry (FACS Calibur, BD, USA).

### **9. *In vitro* cytotoxicity evaluation**

The *in vitro* cytotoxicity assays were performed. Briefly, MCF-7 cells in their logarithmic growth regime were seeded and incubated in 96-well plates at a density of 5000 cells/well in 200  $\mu$ L medium for 24 h, then, the culture medium in each well was carefully replaced by 200  $\mu$ L of fresh medium containing various concentrations of mPEG-SA-rapamycin, the paclitaxel-loaded mPEG-SA-rapamycin micelles, paclitaxel+rapamycin (1 : 3, w/w), free paclitaxel+mPEG-SA-rapamycin (paclitaxel : equivalent rapamycin, 1 : 3, w/w), free paclitaxel or rapamycin, respectively. After 72 h incubation and removal of the media, each well was added with 180  $\mu$ L fresh medium and 20  $\mu$ L of PBS containing 5 mg/mL MTT. The media were discarded after 4 h incubation, and 200  $\mu$ L of DMSO was added into each well to dissolve the formed formazan crystals. The absorbance at 570 nm was recorded on an ELISA plate reader (Varioskan Flash). Cell viability of untreated cells is defined as 100%. Each experiment was done with ten parallel samples. Cells incubated in medium containing 0.1% DMSO were also as controls.

### **10. Cellular uptake study**

Cells were seeded at a density of  $5 \times 10^5$  cells/mL (2 mL medium/well) in 12-well plates and allowed to adhere to the plates for 24 h. After removal of medium, 2 mL of the fresh medium with 0.25  $\mu$ M (equivalent Rhodamine 6G) of Rhodamine 6G or the Rhodamine 6G-loaded mPEG-SA-rapamycin micelles was added into each wells. At the designated time points (2, 4, 8 and 24 h), the cells were washed three times with ice-cold PBS, collected by centrifugation and the resuspended in 0.5 mL PBS. The amount of uptake of Rhodamine 6G was measured on a flow cytometer (BD LSRFortessa, Becton Dickinson) using a 508 nm argon laser for excitation and a 560 nm emission band-pass filter to detect the fluorescence of Rhodamine 6G.

## 11. Cellular efflux study

Cells were seeded at a density of  $5 \times 10^5$  cells/mL (2 mL medium/well) in 12-well plates and allowed to adhere to the plates for 24 h. After removal of medium, 2 mL of the fresh medium with 0.25  $\mu$ M (equivalent Rhodamine 6G) of Rhodamine 6G or the Rhodamine 6G-loaded mPEG-SA-rapamycin micelles was added into each wells and incubated for 4h. Afterwards, the cells were washed three times with ice-cold PBS and incubated in fresh medium. At predetermined time intervals, The amount of Rhodamine 6G retained within the MCF-7 or MCF-7/ADR cells was measured on a flow cytometer (BD LSRFortessa, Becton Dickinson) using a 508 nm argon laser for excitation and a 560 nm emission band-pass filter to detect the fluorescence of Rhodamine 6G.

### References:

- [1] F. Xia, Y. J. Yuan and J. C. Wu, *Bioorg. Med. Chem. Lett.*, 2002, 12, 3301-3303.
- [2] A. Battaglia, A. Guerrini, E. Baldelli, G. Fontana, G. Varchi, C. Samori and E. Bombardelli, *Tetrahedron Lett.* 2006; 47: 2667-2670.
- [3] L. Song, Y. Shen, J. Hou, L. Lei, S. Guo and C. Qian. *Coll. Surf. A*, 2011, 390, 25-32.
- [4] S. C. Kim, D.W. Kim, Y.H. Shim, J.S. Bang, H.S. Oh, S.W. Kim and M.H. Seo, *J. Control. Release* 2001; 72: 191–202.
- [5] H. Wu, L. Zhu and V. P. Torchilin. *Biomaterials* 2013, 34, 1213–1222.
- [6] C. Wang, Y. J. Wang, Y. J. Wang, M. Fan, F. Luo, Z. Y. Qian. *Int. J. Pharm.* 2011, 414: 251– 259.
- [7] Z. Wei, J. Hao, S. Yuan, Y. Li, W. Juan, X. Sha and X. Fang. *Int. J. Pharm.* 2009, 376: 176–185.
- [8] Y. Wang, C. Wang, C. Gong, Y. Wang, G. Guo, F. Luo and Z. Qian. *Int. J. Pharm.* 2012, 434, 1– 8.
- [9] A. W. G. Alani, Y. Bae, D. A. Rao and G. S. Kwon. *Biomaterials*, 2010, 31, 1765–1772.
- [10] J. A. Findlay and L. Adics. *Can. J. Chem.* 1980, 58, 579.

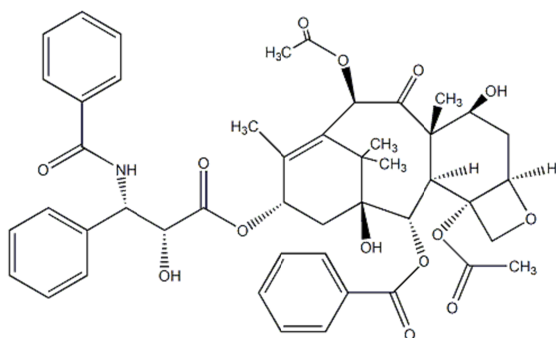

**Scheme S1.** Chemical structure of paclitaxel

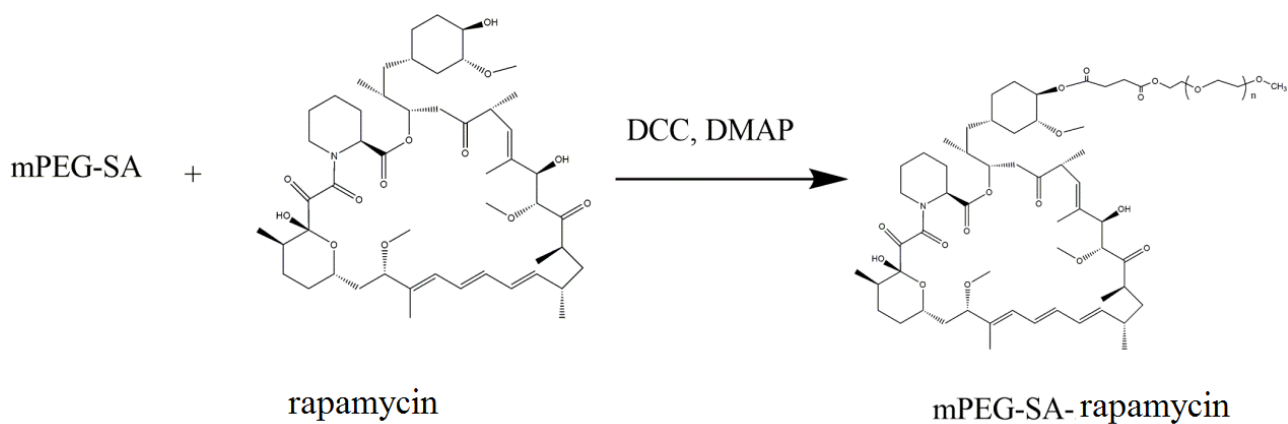

**Scheme S2.** The synthetic route to the mPEG-SA-rapamycin conjugate.

**Table S1.** Cell cycle distributions of MCF-7 cells after incubation with rapamycin or mPEG-SA-rapamycin (n = 3)

|                   | G <sub>0</sub> /G <sub>1</sub> (%) | S(%)  | G <sub>2</sub> /M(%) |
|-------------------|------------------------------------|-------|----------------------|
| Control           | 56.79                              | 28.63 | 14.58                |
| Rapamycin         | 69.42                              | 19.19 | 11.39                |
| mPEG-SA-rapamycin | 68.14                              | 21.30 | 10.56                |

**Table S2.** Cytotoxicity of free rapamycin, mPEG-SA-rapamycin against MCF-7 or MCF-7/ADR cells

|                   | IC <sub>50</sub> of equivalent rapamycin (μg/mL) |       | Resistance index |
|-------------------|--------------------------------------------------|-------|------------------|
|                   | MCF-7/ADR                                        | MCF-7 |                  |
| Rapamycin         | 10.50                                            | 0.20  | 52.5             |
| mPEG-SA-rapamycin | 3.48                                             | 1.02  | 3.4              |

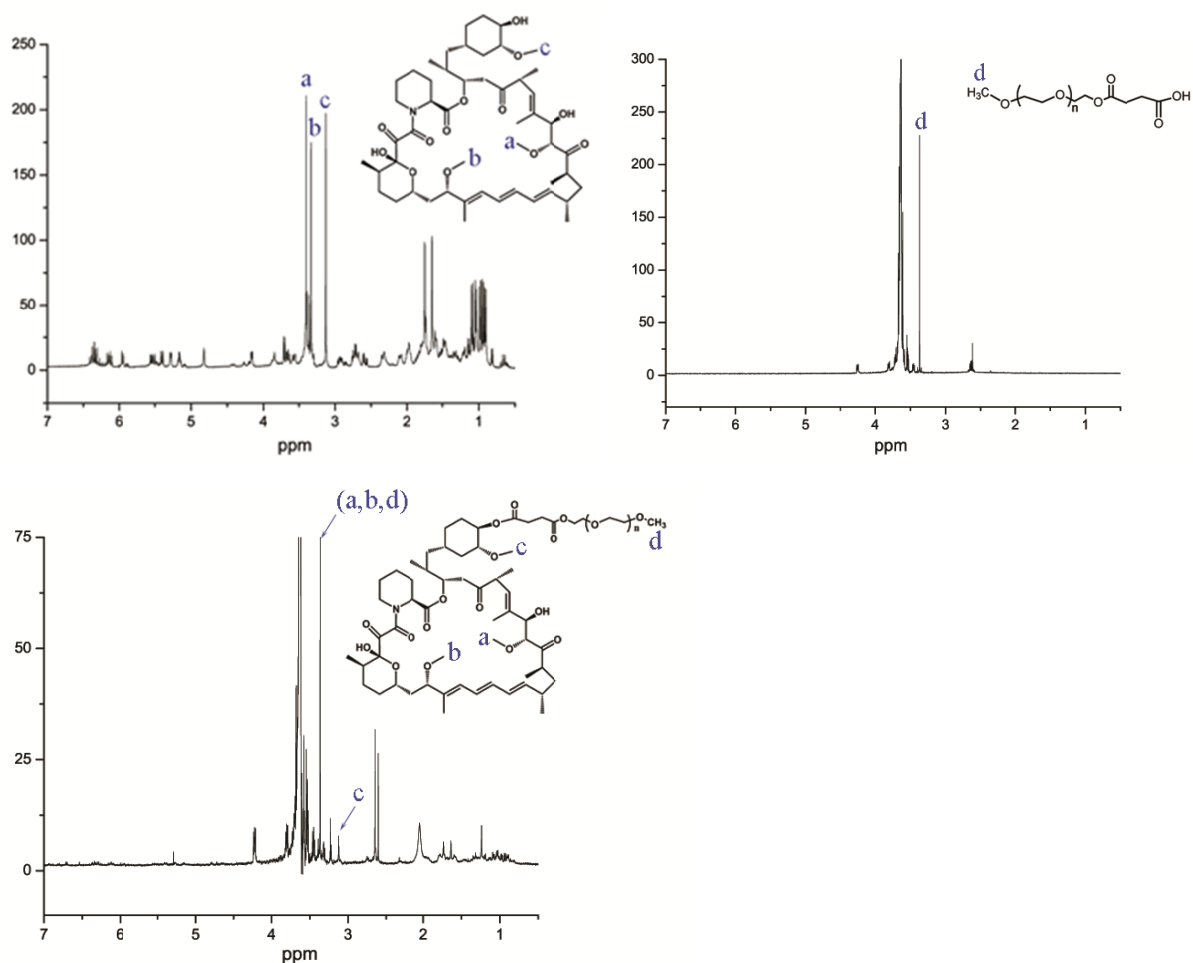

**Figure S1A:** <sup>1</sup>H NMR spectra of rapamycin, mPEG-SA and mPEG-SA-rapamycin in CDCl<sub>3</sub> (400 MHz, δ ppm). Representative assignments of the O-Me groups in the each compound are given in each figure. The integrated peak area ratio of proton **c**: (**a** + **b** + **d**) in the mPEG-SA-rapamycin spectrum is found to be 1:3.04, consistent with the expected proton ratio. The integrated proton area ratios broadly agree with what is expected from a 1:1 conjugate.



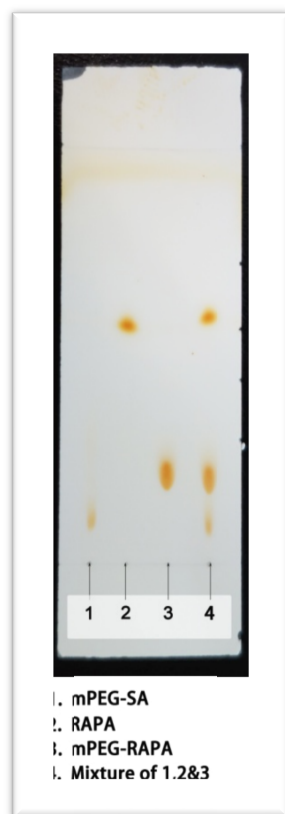

**Figure S1B:** TLC analysis photograph (silica gel, 10% MeOH in  $\text{CH}_2\text{Cl}_2$ ) of the mPEG-SA (1), rapamycin (2), mPEG-rapamycin conjugate (3) and a mixture of mPEG-SA, rapamycin, and mPEG-rapamycin conjugate (4) after iodine stain. It is clear that the mPEG-rapamycin conjugate is pure, containing just a single specie.

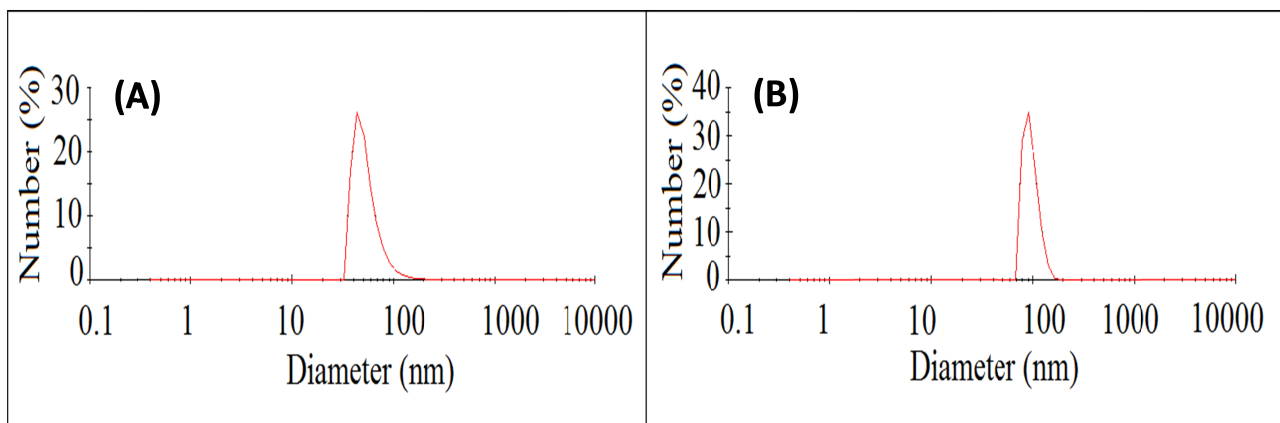

**Figure S2.** Hydrodynamic diameter distributions of the mPEG-SA-rapamycin micelles (A) and the paclitaxel loaded mPEG-SA-rapamycin micelles (B) measured by dynamic light scattering.

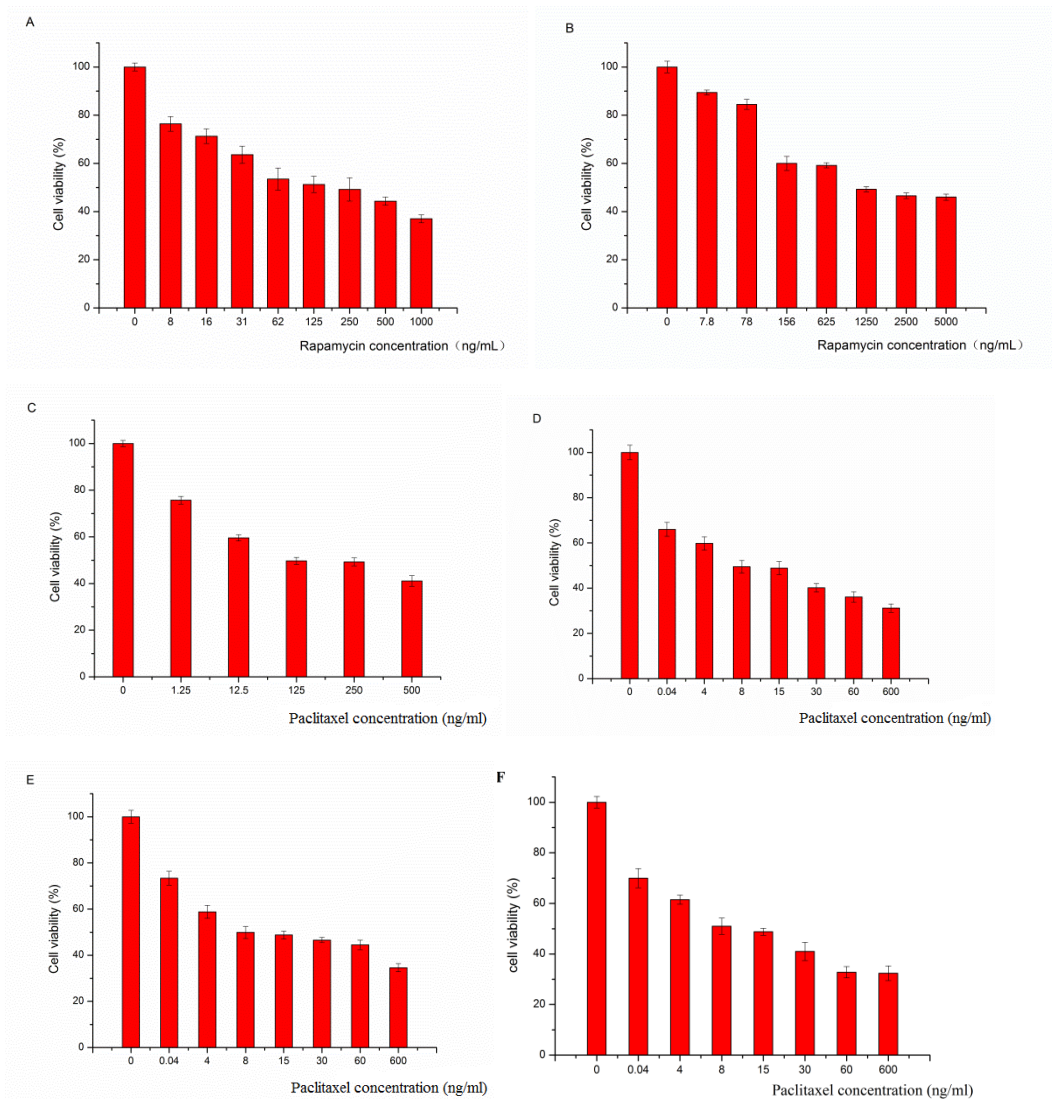

**Figure S3.** Dose-dependent *in vitro* cytotoxicities of different drug formulations against the drug-sensitive MCF-7 cell line. (A) rapamycin, (B) mPEG-SA-rapamycin, (C) paclitaxel, (D) rapamycin+paclitaxel physical mixture (3:1 w/w), (E) paclitaxel+mPEG-SA-rapamycin physical mixture (3:1, w/w) equivalent rapamycin : paclitaxel and (F) the paclitaxel-loaded mPEG-SA-rapamycin micelles. Data are presented as mean  $\pm$  SD (n=5).

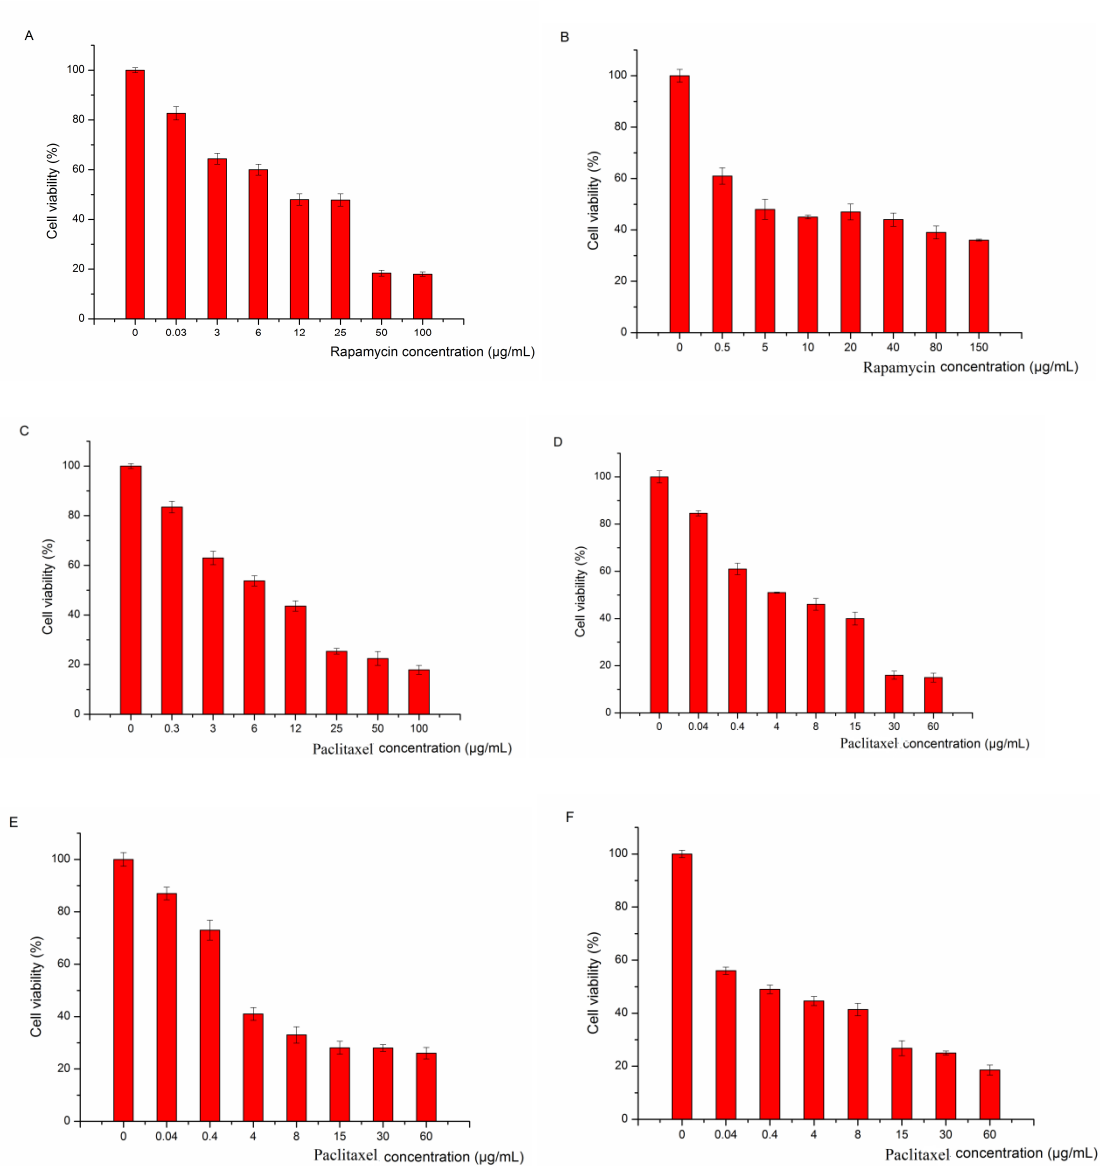

**Figure S4.** Dose-dependent *in vitro* cytotoxicities of different drug formulations against the multidrug resistant MCF-7/ADR cell line. (A) rapamycin, (B) mPEG-SA-rapamycin, (C) paclitaxel, (D) rapamycin+paclitaxel physical mixture (3:1, w/w), (E) free paclitaxel+ free mPEG-SA-rapamycin physical mixture (3:1 w/w equivalent rapamycin:paclitaxel) and (F) the paclitaxel-loaded mPEG-SA-rapamycin micelles. Data are presented as mean  $\pm$  SD (n=5).
